# Supplementary material for: The 4.2 ka event: multi-proxy records from a closed lake in the northern margin of the East Asian summer monsoon
Source: Copernicus journal article supplement (doi:10.5194/cp-2018-66), 2018-06-18
Supplement: Supplementary file [file cp-2018-66-RC1-supplement.pdf]

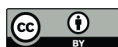

1  
2  
3  
4  
5  
6  
7  
8  
9  
10  
11  
12  
13  
14  
15  
16  
17  
18  
19  
20  
21  
22  
23  
24  
25  
26  
27  
28  
29

**The 4.2 ka event: multi-proxy records from a closed lake in the northern margin of the East Asian summer monsoon**

**Jule Xiao<sup>1,2,3</sup>, Shengrui Zhang<sup>1</sup>, Jiawei Fan<sup>1</sup>, Ruilin Wen<sup>1,2</sup>, Dayou Zhai<sup>4</sup>, Zhiping Tian<sup>5</sup>, and Dabang Jiang<sup>5</sup>**

<sup>1</sup>CAS Key Laboratory of Cenozoic Geology and Environment, Institute of Geology and Geophysics, Chinese Academy of Sciences, Beijing 100029, China

<sup>2</sup>CAS Center for Excellence in Life and Paleoenvironment, Beijing 100044, China

<sup>3</sup>College of Earth and Planetary Sciences, University of Chinese Academy of Sciences, Beijing 100049, China

<sup>4</sup>School of Resources, Environment and Geosciences, Yunnan University, Kunming 650091, China

<sup>5</sup>Nansen–Zhu International Research Centre, Institute of Atmospheric Physics, Chinese Academy of Sciences, Beijing 100029, China

Correspondence: Jule Xiao ([jlxiao@mail.iggcas.ac.cn](mailto:jlxiao@mail.iggcas.ac.cn))



30 **Abstract.** The 4.2 ka event has been widely investigated since it was suggested to be a  
31 possible cause for the collapse of ancient civilizations. ~~With the growth of proxy records for~~  
32 ~~decades, however,~~ both its nature and its spatial pattern have become ~~controversial~~. Here we  
33 examined multi-proxy data of the grain-size distribution, ostracode assemblage, pollen  
34 assemblage and the pollen-reconstructed mean annual precipitation from a sediment core at  
35 Hulun Lake in northeastern Inner Mongolia spanning the period between 5000 and 3000 cal.  
36 yr BP to identify the nature and the associated mechanism of the 4.2 ka event occurring in the  
37 monsoonal region of eastern Asia. Higher sand fraction contents, littoral ostracodes  
38 abundances and Chenopodiaceae pollen percentages together with lower mean annual  
39 precipitations reveal a significant dry event at the interval of 4230–3820 cal. yr BP that could  
40 be a regional manifestation of the 4.2 ka event in the northern margin of the East Asian  
41 summer monsoon (EASM). We suggest that the drought would be caused by a large decline  
42 in the intensity of the EASM on millennial-to-centennial scales that could be physically  
43 related to persistent cooling of surface waters in the western tropical Pacific and the North  
44 Atlantic. The cooling of western tropical Pacific surface waters could reduce moisture  
45 productions over the source area of the EASM, while the cooling of North Atlantic surface  
46 waters could suppress northward migrations of the EASM rainbelt, both leading to a  
47 weakened EASM and thus decreased rainfall in the northern margin of the EASM.

48  
49  
50  
51  
52  
53  
54  
55  
56  
57  
58  
59

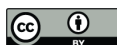

## 60 **1 Introduction**

61

62 The 4.2 ka event has attracted worldwide interest since two articles published in the  
63 periodical *Science* (Weiss and Bradley, 2001; deMenocal, 2001) demonstrated that the  
64 drought that occurred 4.2 ka ago could be a possible cause for the collapse of ancient  
65 civilizations. Judging from the viewpoint of the history of paleoclimate research, however,  
66 almost no special attention had been paid to the 4.2 ka event prior to the publication of the  
67 two highlighted articles when the Holocene climatic instability had become an increasingly hot  
68 topic in the field of paleoclimatology.

69 In early 1990s when an oxygen isotope record for the Greenland Ice-core Project (GRIP)  
70 Summit ice core has just come out, the Holocene climate was viewed as extremely stable in  
71 contrast with large, abrupt climate changes during both the last two glaciations and the last  
72 interglacial (Dansgaard et al., 1993). In 1995, however, concentrations of sea salt and  
73 terrestrial dusts from the same ice core demonstrated that the Holocene climate of Greenland  
74 was punctuated by 4 times of millennial-scale shifts during the periods of 8800–7800, 6100–  
75 5000, 3100–2400 and 600–0 yr ago (O’Brien et al., 1995). Subsequently in 1997, an  
76 integrated Holocene climatic record of accumulation rate,  $\delta^{18}\text{O}$ -based temperature, chloride  
77 and calcium concentrations, fire frequency and methane concentration for the Greenland Ice  
78 Sheet Project II (GISP2) ice core revealed a cold event that occurred between 8.4 and 8.0 ka  
79 ago, typically peaking at 8.25 cal. ka BP (Alley et al., 1997). This was first to put forward a  
80 prominent, widespread climatic event for the warm Holocene, i.e., the 8.2 ka event. In any  
81 case, however, no clear signals of the 4.2 ka event had been identified in the ice-core records  
82 from Greenland.

83 Encouraged by the findings of O’Brien et al. (1995), Bond et al., (1997) launched an  
84 investigation of deep-sea sediments in the North Atlantic and detected a series of abrupt shifts  
85 that punctuated the Holocene climate through studies on ice-rafted debris in the sediments.  
86 These abrupt climate events seemingly occurred at a cyclicity of  $1470 \pm 500$  yr during the  
87 Holocene, which did not generate any particularity for the 4.2 ka event. Taking the  
88 paleoclimatic record of Greenland ice cores together, the 4.2 ka event appears to be  
89 unexceptional for the Holocene climate in high latitudes of the Northern Hemisphere.

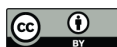

90 As early as in 1990s, in fact, the 4.2 ka event was first explained as a possible  
91 contributor to the collapse of ancient civilization (Weiss et al., 1993). Weiss et al. (1993)  
92 identified a marked increase in aridity and wind circulation occurring in northern  
93 Mesopotamia at 2200 BC based on studies of archaeological sites on alluvial plains of the  
94 Tigris and Euphrates Rivers, suggesting that the abrupt climatic change induced a considerable  
95 degradation of land-use conditions and thus caused the collapse of the rain-fed agriculture  
96 civilization of western Asia. Years later, the above-mentioned two articles (Weiss and Bradley,  
97 2001; deMenocal, 2001) demonstrated that the drought that occurred 4.2 ka ago could explain  
98 the societal collapse of Old World civilizations based on existing archaeological and  
99 paleoclimatic data. This point of view has promoted extensive investigations into the causal  
100 relationship between cultural evolution and climate change on archaeological records and also  
101 drawn much attention from paleoclimatologists to researches of the 4.2 ka event. With the  
102 accumulation of proxy records, however, both the nature of the 4.2 ka event (Marchant and  
103 Hooghiemstra, 2004, Magny et al., 2009) and the manner of societal responses to climate  
104 change (Drysedale et al., 2006; Staubwasser and Weiss, 2006) have become increasingly  
105 controversial.

106 **Researches** on the 4.2 ka event and its impact on cultural evolution in China have been  
107 motivated by Hsü's view that famines and mass migrations occurring in ancient China could  
108 have resulted from regional droughts related to global cooling (Hsü, 1998). Wu and Liu (2004)  
109 synthesized data from paleoclimatic records in eastern China and suggested that the climatic  
110 anomaly that occurred ~4.2 ka ago produced a drought in the north and flooding in the south,  
111 which was responsible for the collapse of neolithic cultures in the central plain of China  
112 during the late third millennium BC. Liu and Feng (2012) recently examined the newly  
113 published data of paleoclimatic and archaeological records spanning the transition from the  
114 middle to late Holocene and offered a different interpretation from that of Wu and Liu (2004).  
115 In brief, an abrupt climatic shift occurred in northern China at ~4 cal. ka BP; while in  
116 southern China the ~4 cal. ka event had several effects. With the associated climatic drying at  
117 ~4 cal. ka BP, Chinese Neolithic cultures both in the north and in the south collapsed; while  
118 the Longshan Culture in the central plain thrived.



Here we examined the paleoclimatic data from a sediment core at Hulun Lake in northeastern Inner Mongolia and focused on the 4.2 ka event occurring in the lake region. Hulun Lake is located in the northern margin of the East Asian summer monsoon that represents a climatically sensitive zone. The multi-proxy paleoclimatic records from the lake would provide new insights into the 4.2 ka event. This study is aimed to identify the nature and the associated mechanism of the 4.2 ka event occurring in the monsoonal region of eastern Asia.

## 2 Study site

Hulun Lake (48°30.667' to 49°20.667'N, 117°0.167' to 117°41.667'E), the fifth largest lake in China, is situated about 30 km south of Manchuria, Inner Mongolia, China (Fig. 1). It lies in an inland graben basin that was formed in the late Pliocene (Xu et al., 1989). It has an area of 2339 km<sup>2</sup> and a maximum water depth of 8 m when the lake level attains to the highest status at an elevation of 545.3 m a.s.l. (measurements in August 1964; Xu et al., 1989). Today, the lake is closed and the maximum water depth is 5 m (Fig. 1). Low mountains and hills of Mesozoic volcanic rocks border the lake on the northwest and form a fault-scarp shoreline. Broad lacustrine and alluvial plains extend from the southern and eastern shores of the lake with scattered aeolian dunes. The lake has a catchment of 37,214 km<sup>2</sup> within the borders of China. Two rivers, the Herlun from the southwest and the Urshen Rivers from the southeast, supply water for the lake (Fig. 1). The Dalanolom River, an intermittent river to the northeast of the lake, drains the lake when the elevation of the lake level exceeds 543.4 m a.s.l. and enters the lake when the lake level is lower and the discharge of the Hailar River is larger as well (Xu et al., 1989) (Fig. 1).

Hulun Lake is located in a semi-arid area of the middle temperate zone (Fig. 1). The climate of the lake's region is influenced by the East Asian monsoon and the Westerlies (Chinese Academy of Sciences, 1984; Zhang and Lin, 1985). During summer, warm, moist southerly air-masses interact with cold air from the northwest and produce most of the annual precipitation. During winter, cold, dry northwesterly airflows prevail and generate strong winds and cold weathers. In the lake region, mean annual temperature is 0.3°C with a July



average of 20.3°C and a January average of −21.2°C. Annual precipitation is 247 to 319 mm, and over 80% of the annual precipitation falls in June–September. Annual evaporation reaches 1400 to 1900 mm, which is ~6 times the annual precipitation. The lake is covered with ~1 m of ice from November to April.

The ostracodes living in the lake today include *Limnocythere inopinata* (Baird), *Candoniella suzini* Schneider, *Pseudocandona albicans* (Brady), *Pseudocandona compressa* (Koch), *Cyclocypris serena* (Koch), *Ilyocypris gibba* (Ramdohr) and *Ilyocypris salebrosa* Stepanaiths (Xu et al., 1989; Wang and Ji, 1995). *Limnocythere inopinata* is the dominant species. Aquatic plants are scarce in the lake and confined to the areas of the river mouth and parts of the nearshore zone.

The modern natural vegetation of the lake basin belongs to the middle temperate steppe (Compilatory Commission of Vegetation of China, 1980; Xu et al., 1989). The vegetation cover ranges from relatively moist forb-grass meadow-steppe in the piedmont belt to moderately dry grass steppe on the alluvial plain and dry bunchgrass–undershrub *Artemisia* steppe on the lacustrine plain. Halophilic Chenopodiaceae plants are distributed in the lowlands. The forests are developed on the west slopes of the Great Hinggan Range, where the Urshen and Hailar River rise, accompanied by scrubs and herbs under the trees. Larch forests cover the southern part of the Hentiy Mountains where the Herlun River rises. Patches of pine forests and birch shrubberies occur in the alpine belt.

168

### 169 **3 Material and methods**

170

#### 171 **3.1 Lithology and chronology of the HL06 core**

172

Drilling was conducted at a water depth of 5 m in the central part of Hulun Lake in January 2006 when the lake was frozen (Fig. 1), using a TOHO drilling system. A sediment core was extracted to a depth beneath the lake floor of 1.7 m and is designated HL06 (49°07.615' N, 117°30.356' E; Fig. 1). The core section was split, photographed and described on site and then cut into 1-cm segments, resulting in 170 samples for laboratory analyses.

177



178 The sediments of the HL06 core can be divided into three parts: 1) upper blackish-grey  
 179 oozy mud at depths of 0–35 cm, 2) middle dark grey to blackish-grey, massive sandy mud  
 180 with scattered fragments of ostracodes and mollusk shells at depths of 35–100 cm, and 3)  
 181 lower greenish-grey homogeneous mud at depths of 100–170 cm (Xiao et al., 2009).

182 Thirteen bulk samples were collected from organic-rich horizons of the HL06 core and  
 183 dated with an Accelerator Mass Spectrometry (AMS) system (Compact-AMS, NEC  
 184 Pelletron) at Paleo Labo Co., Ltd. in Japan. As shown in Xiao et al. (2009), the uppermost 0–1  
 185 cm of the core sediments yields a  $^{14}\text{C}$  age of  $685 \pm 21$  yr that was considered to result from  
 186 carbon reservoir effects on radiocarbon dating of the bulk organic matter of Hulun Lake  
 187 sediments. To produce an age–depth model for the HL06 core, the carbon reservoir age of  
 188  $685 \pm 21$  yr was first subtracted from all the original  $^{14}\text{C}$  ages, and then calibrations are  
 189 performed on the carbon reservoir-free  $^{14}\text{C}$  ages. The conventional ages were converted to  
 190 calibrated ages using the OxCal3.1 radiocarbon age calibration program (Bronk Ramsey,  
 191 2001) with the IntCal04 calibration data (Reimer et al., 2004). The age–depth model indicates  
 192 that the HL06 core covers the last ~11,000 yr (Xiao et al., 2009).

193

### 194 3.2 Proxy analyses of the HL06 core

195

196 The HL06 core has been analysed at 1-cm interval for multiple proxies including  
 197 grain-size distribution (Xiao et al., 2009), ostracode assemblage (Zhai et al., 2011), and pollen  
 198 assemblage (Wen et al., 2010a) in order to investigate the Holocene history of changes in the  
 199 hydrology of Hulun Lake and in vegetation and climate of the lake region. Grain-size  
 200 distribution was determined with a Malvern Mastersizer 2000 laser grain-size analyzer (Xiao  
 201 et al., 2009). Each sample of sediment was pretreated with hydrogen peroxide to remove  
 202 organic matter and then with boiled hydrochloric acid to remove carbonates. The sample  
 203 residue was dispersed with sodium metaphosphate on an ultrasonic vibrator before grain-size  
 204 analysis.

205 For the ostracode assemblage analysis, each sample of ~300 mg of air-dried sediment  
 206 was pretreated with hydrogen peroxide–sodium carbonate solution (pH 9–10) to disaggregate  
 207 the sediment (Zhai et al., 2011). Fossil ostracode valves were extracted by sieving in water



208 through a 250-mesh sieve (63- $\mu$ m pore size). Ostracode was identified and counted from the  
209 sieve residue spread onto a glass plate with an Olympus stereomicroscope at 40 $\times$   
210 magnifications following the taxonomy of Meisch (2000) and Hou et al. (2002). Most  
211 samples yielded 300 to 4000 ostracode valves.

212 For the pollen assemblage analysis, each sample of  $\sim$ 1 g of air-dried sediment was  
213 pretreated with hydrochloric acid to remove carbonates and with sodium hydroxide to remove  
214 organic matter; the residue was then kept in hydrofluoric acid to remove silicates (Wen et al.,  
215 2010a). Fossil pollen grains were extracted by wet sieving of the resulting residue through a  
216 sieve diameter of 10  $\mu$ m with an ultrasonic cleaner. Pollen was identified and counted with an  
217 Olympus light microscope at 400 $\times$  magnifications. More than 600 pollen grains were counted  
218 for each sample. The percentages of tree and herb pollen taxa were based on the sum of the  
219 total terrestrial pollen in a sample, and those of each taxon of both aquatic pollen and fern  
220 spores based on the sum of the terrestrial pollen plus the aquatic pollen or fern spores of the  
221 taxon in a sample.

222 In addition, the history of changes in precipitation in the Hulun Lake region during the  
223 Holocene was quantitatively reconstructed (Wen et al., 2010b) based on the pollen profile of  
224 the HL06 core (Wen et al., 2010a), using a pollen–climate transfer function for temperate  
225 eastern Asia (Wen et al., 2013).

226

### 227 3.3 Proxy data from the HL06 core used for the present study

228

229 The segment of the HL06 core spanning the period between 5000 and 3000 cal. yr BP is  
230 used for the present study to focus on ~~the research of~~ the 4.2 ka event occurring in the Hulun  
231 Lake region. Fig. 2 shows the lithology and ages of the core segment between 105 and 55 cm  
232 at depth, which covers the segment between dated horizons of a calibrated age older than  
233 5000 cal. yr BP and of a calibrated age younger than 3000 cal. yr BP. Ages of sampled  
234 horizons of the core segment spanning the period of 5000–3000 cal. yr BP were derived by  
235 linear interpolation between radiocarbon-dated horizons using the mean values of  $2\sigma$  ranges  
236 of calibrated ages.





Data of grain-size distribution (Xiao et al., 2009), ostracode assemblage (Zhai et al., 2011), pollen assemblage (Wen et al., 2010a), and mean annual precipitation (Wen et al., 2010b) from the HL06 core for the period of 5000–3000 cal. yr BP were re-examined in the present study in order to explore the detailed process of climate changes on millennial-to-centennial scales in the Hulun Lake region around 4.2 cal. ka BP.

## 4 Results

The sediments of the core segment spanning the period of 5000–3000 cal. yr BP consist of dark grey to blackish-grey, massive sandy mud in which the scattered fragments of ostracode and mollusk shells can be seen (Fig. 2). Five radiocarbon dates provide age controls for the core segment spanning the period of 5000–3000 cal. yr BP (corresponding to the core depths of 97–68 cm) (Fig. 2; Table 1). Data of sand fraction content, littoral ostracodes abundance, Chenopodiaceae pollen percentage, and mean annual precipitation from the core segment spanning the period of 5000–3000 cal. yr BP were plotted against age in Figure 3.

### 4.1 Sand fraction content

The content of the sand fraction in the core sediments has an average of 7.5% for the period of 5000–3000 cal. yr BP (Fig. 3). At the interval of 4560–3820 cal. yr BP (core depth: 92.0–82.5 cm), the sand fraction content shows higher-than-average values with a maximum of 21.1% and an average of 15.0% (Fig. 3).

### 4.2 Littoral ostracodes abundance

The abundance of the littoral ostracodes including *Pseudocandona albicans*, *Pseudocandona* sp., *Candoniella subellipsoida*, and *Cypridopsis* sp. from the core sediments has an average of 22 valves g<sup>-1</sup> for the period of 5000–3000 cal. yr BP (Fig. 3). At the interval of 4380–3380 cal. yr BP (core depth: 90.0–75.5 cm), the littoral ostracodes abundance shows



266 higher-than-average values with a maximum of 70 valves  $\text{g}^{-1}$  and an average of 40 valves  $\text{g}^{-1}$   
267 (Fig. 3).

268

269 ~~4.3 Chenopodiaceae pollen percentage~~

270

271 The percentage of Chenopodiaceae pollen from the core sediments has an average of  
272 42.9% for the period of 5000–3000 cal. yr BP (Fig. 3). At the interval of 4610–3460 cal. yr  
273 BP (core depth: 92.5–77.0 cm), the Chenopodiaceae pollen percentage shows  
274 higher-than-average values with a maximum of 60.2% and an average of 51.3% (Fig. 3).

275

276 4.4 Mean annual precipitation

277

278 The mean annual precipitation in the lake region reconstructed on the pollen profile of  
279 the sediment core has an average of 297.3 mm for the period of 5000–3000 cal. yr BP (Fig. 3).  
280 At the interval of 4580–3580 cal. yr BP (core depth: 92.0–79.5 cm), the mean annual  
281 precipitation shows lower-than-average values with a minimum of 264.0 mm and an average  
282 of 278.2 mm (Fig. 3).

283

## 284 5 Discussion

285

286 5.1 Climatic implication of proxy data from the HL06 core

287

288 Grain-size distributions of the core sediments show that the clay, silt and sand fractions  
289 average 35.8%, 60.6% and 3.6% of the clastic materials during the Holocene, respectively  
290 (Xiao et al., 2009). Sand grains from the nearshore zone of Hulun Lake could be transported  
291 to and deposited in the central part of the lake when the lake assumed low stands. Therefore  
292 increases in the relative percentage of the sand fraction in the core sediments were interpreted  
293 to indicate drops in the water level of Hulun Lake (Xiao et al., 2009). We thus infer that  
294 higher values of the sand fraction content at the interval of 4560–3820 cal. yr BP imply  
295 relatively lower lake levels at that time (Fig. 3).



Ostracode assemblages of the core sediments suggest that fourteen species of ostracodes belonging to nine genera occur in Hulun Lake during the Holocene and *Limnocythere inopinata* is the dominant species (Zhai et al., 2011). *Pseudocandona albicans*, *Pseudocandona* sp., *Candoniella subellipsoida*, and *Cypridopsis* sp. from the core sediments were interpreted as littoral ostracode taxa because these ostracodes usually live in small water bodies and shallow waters and have a wide tolerance to water temperature or salinity (Zhai et al., 2011). We thus infer that higher values of the littoral ostracodes abundance at the interval of 4380–3380 cal. yr BP imply relatively lower lake levels at that time (Fig. 3).

Pollen assemblages of the core sediments suggest that dry grass steppe dominated by *Artemisia* and Chenopodiaceae plants were developed in the Hulun Lake basin during most of the Holocene (Wen et al., 2010a). In the modern steppe of northern China, Chenopodiaceae predominates over *Artemisia* in the desert steppe as compared with in the typical steppe. Therefore increases in the relative percentage of Chenopodiaceae pollen in the core sediments were interpreted to indicate decreases in the effective moisture in the lake basin (Wen et al., 2010a). We thus infer that higher values of the Chenopodiaceae pollen percentage at the interval of 4610–3460 cal. yr BP imply relatively lower effective moistures in the lake basin at that time (Fig. 3).

The pollen-reconstructed mean annual precipitation yields a value of around 285 mm in the Hulun Lake region for the last decades (Wen et al., 2010b). This value of the mean annual precipitation falls within the range of observed data of the annual precipitation (247–319 mm), demonstrating the validity of the pollen–climate transfer function in quantitatively reconstructing the regional precipitation. ~~Therefore lower values of the mean annual precipitation at the interval of 4580–3580 cal. yr BP denote relatively drier conditions in the lake basin at that time (Fig. 3).~~

320

## 5.2 The nature and timing of the 4.2 ka event in the Hulun Lake region

322

As remarked above, the sand fraction content and the littoral ostracodes abundance of the lake sediments can be used as indicators of changes in the lake level that is closely related to changes in the water balance (precipitation plus runoff minus evaporation) of the lake; while



the Chenopodiaceae pollen percentage can be used as a direct indicator of changes in the effective moisture in the lake basin. The mean annual precipitation can directly indicate changes in the amount of precipitation in the lake basin. During the period of 5000–3000 cal. yr BP, data of the sand fraction content, littoral ostracodes abundance, Chenopodiaceae pollen percentage, and the mean annual precipitation ~~can be~~ well correlated with each other, although the intervals of a relatively drier climate in the lake basin registered by different proxies differ slightly in the time of start and end (Fig. 3).

In order to detect the pattern of temporal changes in the regional dry–wet condition during the period of 5000–3000 cal. yr BP, principle component analysis (PCA) was performed to analyze the time series of data of the sand fraction content, littoral ostracodes abundance, Chenopodiaceae pollen percentage, and the mean annual precipitation. All the raw data of the 4 proxies were standardized, and then PCA was conducted on the standardized data with the proxies as variables. F1, F2 and the first three factors of PCA capture 74.5%, 15.4% and 97.9% of the total variance within the data set, respectively. As shown in Figure 3, PCA F1 with an average of 0 for the period of 5000–3000 cal. yr BP displays higher-than-average values at the interval of 4540–3480 cal. yr BP (core depth: 92.0–77.5 cm) with a maximum of 1.71 and an average of 0.88.

PCA F1 reflects the common characteristics of the aforementioned four proxies for the relatively drier climate in the lake region at the interval of 4540–3480 cal. yr BP. Discrepancies in both the timing of the relatively drier interval from each proxy and the detail of different proxies on centennial to multi-decadal scales within the interval can be explained by differences in the response of different proxies to changes in the regional precipitation and the lake’s hydrology. We thus suggest that the climatic drying occurring in the Hulun Lake basin could be the regional manifestation of the 4.2 ka event.

In order to delimitate a dry event from the relatively drier climate at the interval of 4540–3480 cal. yr BP reflected by PCA F1, we define a central interval at which PCA F1 displays values that are larger than its average for the interval of 4540–3480 cal. yr BP (0.88). This central interval started at 4230 cal. yr BP and ended at 3820 cal. yr BP with duration of 410 yr, which exactly delineates a peak interval for each of the four proxies (Fig. 3). We thus



355 suggest that the dry event corresponding to the 4.2 ka event occurred in the Hulun Lake  
356 region at 4230–3820 cal. yr BP and lasted for 410 yr.

357

358 5.3 Possible cause of the 4.2 ka event in the Hulun Lake region

359

360 Hulun Lake is situated in the northern marginal zone of the East Asian summer  
361 monsoon (EASM) (Fig. 1). Modern observations indicate that precipitation in the Hulun Lake  
362 region reaches its peak value in July and ~70% of the annual precipitation falls in late June  
363 through early August (Xu et al., 1989). Changes in the precipitation of the lake region in the  
364 summer half-year totally follow the northward migrations of the EASM rainbelt (Fig. 4),  
365 indicating that increases in the precipitation of the lake region would be closely related to  
366 increases in the strength of the EASM. These data suggest that the dry event that occurred in  
367 the Hulun Lake region at 4230–3820 cal. yr BP **implies a large decline of the EASM.**

368 The northward migrations of the EASM rainbelt in rainy seasons of East Asia are  
369 characterized by two discontinuous jumps (i.e., jumping first to the Yangtse River–Huaihe  
370 River basin, southwestern Japan and southern Korea in late June and then to northern China,  
371 northeastern China and northern Korea in middle July after ~~landing in~~ southern China in late  
372 May) (Fig. 4), ~~which are~~ influenced not only by the ocean–atmosphere interactions in the  
373 tropical Pacific because the moisture/rainfall brought by the EASM onto the land derives  
374 from the western tropical Pacific but also by the pattern of atmospheric circulation over  
375 Northern Hemisphere high latitudes because the EASM frontal rainfall results from the  
376 interaction between the warm-moist, southerly air-masses and the cold-dry, northwesterly  
377 airflows (Chinese Academy of Sciences, 1984; Zhang and Lin, 1985). In Figure 5, therefore,  
378 dry–wet oscillations in the Hulun Lake region reflected by PCA F1 for the period of 5000–  
379 3000 cal. yr BP are compared with the sea-surface-temperature (SST) record from the western  
380 tropical Pacific (Stott et al., 2004) and the hematite-stained-grains (HSG) record from the  
381 North Atlantic (Bond et al., 2001).

382 As shown in Fig. 5, the large decline of the EASM occurring at 4230–3820 cal. yr BP  
383 coincides, within age uncertainties, with decreases in the SST of the western tropical Pacific  
384 (Stott et al., 2004) and with increases in the HSG concentration in the North Atlantic



385 sediments (Bond et al., 2001). This coincidence implies a physical link between the EASM  
386 decline on millennial-to-centennial scales and the persistent cooling of surface waters of the  
387 western tropical Pacific as well as the North Atlantic. In brief, continual decreases in sea  
388 surface temperature of the western tropical Pacific presumably caused by more intense, more  
389 frequent El Niño (Moy et al., 2002) could reduce the formation of water vapor over the source  
390 area of the EASM, thereby decreasing the moisture available for transport via the EASM  
391 circulation from the western tropical Pacific onto the Asian inland and leading to a weakened  
392 EASM. While decreases in sea surface temperature of the North Atlantic could suppress the  
393 northward migration of the EASM front, thereby hampering the northward jumps of the  
394 EASM rainbelt and resulting in weakened rainfall in the northern marginal zone of the  
395 EASM.

396

## 397 **6. Conclusions**

398

399 Multiple proxies of a sediment core at Hulun Lake in northeastern Inner Mongolia  
400 reveal a prominent dry event occurring at the interval of 4230–3820 cal. yr BP that could be  
401 the regional manifestation of the 4.2 ka event in the northern marginal zone of the EASM. The  
402 drought would have resulted from a large decline of the EASM that could be physically linked  
403 with the persistent cooling of surface waters of the western tropical Pacific and the North  
404 Atlantic on millennial-to-centennial scales.

405 Although more and more proxy data have been obtained, an integrated view of the 4.2  
406 ka event is still far beyond reach. Future studies should be focused on the investigation of  
407 high-quality, high-resolution proxy records from more, climatically sensitive and  
408 geographically representative regions in order to explore the spatiotemporal pattern of the 4.2  
409 ka event and the associated dynamic mechanism.

410

## 411 **Acknowledgments**

412



413 This study was financially supported by the National Key R&D Program of China  
 414 (Grant 2017YFA0603400) and the National Natural Science Foundation of China (Grant  
 415 41130101).

416

417

418

## 419 **References**

420

421 Alley, R. B., Mayewski, P. A., Sowers, T., Stuiver, M., Taylor, K. C., and Clark, P. U.:  
 422 Holocene climatic instability: A prominent, widespread event 8200 yr ago, *Geology*, 25,  
 423 483–486, 1997.

424 Bond, G., Showers, W., Cheseby, M., Lotti, R., Almasi, P., deMenocal, P., Priore, P., Cullen,  
 425 H., Hajdas, I., and Bonani, G.: A pervasive millennial-scale cycle in North Atlantic  
 426 Holocene and glacial climates, *Science* 278, 1257–1266, 1997.

427 Bond, G., Kromer, B., Beer, J., Muscheler, R., Evans, M. N., Showers, W., Hoffmann, S.,  
 428 Lotti-Bond, R., Hajdas, I., and Bonani, G.: Persistent solar influence on North Atlantic  
 429 climate during the Holocene, *Science*, 294, 2130–2136, 2001.

430 Bronk Ramsey, C.: Development of the radiocarbon calibration program, *Radiocarbon*, 43,  
 431 355–63, 2001.

432 Chinese Academy of Sciences (Compilatory Commission of Physical Geography of China):  
 433 Physical Geography of China: Climate. Science Press, Beijing, pp. 1–30, 1984 (in  
 434 Chinese).

435 Compilatory Commission of Vegetation of China: Vegetation of China, Science Press,  
 436 Beijing, pp. 932–955, 1980 (in Chinese).

437 Dansgaard, W., Johnsen, S. J., Clausen, H. B., Dahl-Jensen, D., Gundestrup, N. S., Hammer,  
 438 C. U., Hvidberg, C. S., Steffensen, J. P., Sveinbjörnsdottir, A. E., Jouzel, J., and Bond,  
 439 G.: Evidence for general instability of past climate from a 250-kyr ice-core record,  
 440 *Nature*, 364, 218–220, 1993.

441 deMenocal, P. B.: Cultural responses to climate change during the late Holocene, *Science*,  
 442 292, 667–673, 2001.

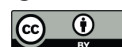

- 443 Drysdale, R., Zanchetta, G., Hellstrom, J., Maas, R., Fallick, A., Pickett, M., Cartwright, I.,  
444 and Piccini, L.: Late Holocene drought responsible for the collapse of Old World  
445 civilizations is recorded in an Italian cave flowstone, *Geology*, 34, 101–104, 2006.
- 446 Hou, Y. T., Gou, Y. X., and Chen, D. Q.: Fossil Ostracoda of China (Vol. 1), Science Press,  
447 Beijing, 1090 pp., 2002 (in Chinese).
- 448 Hsü, K. J.: Sun, climate, hunger, and mass migration, *Science in China (Series D)*, 41, 449–  
449 472, 1998.
- 450 Liu, F. G. and Feng, Z. D.: A dramatic climatic transition at ~4000 cal. yr BP and its cultural  
451 responses in Chinese cultural domains, *Holocene*, 22, 1181–1197, 2012.
- 452 Magny, M., Vannière, B., Zanchetta, G., Fouache, E., Touchais, G., Petrika, L., Coussot, C.,  
453 Walter-Simonnet, A. V., and Arnaud, F.: Possible complexity of the climatic event  
454 around 4300–3800 cal. BP in the central and western Mediterranean, *Holocene*, 19,  
455 823–833, 2009.
- 456 Marchant, R. and Hooghiemstra, H.: Rapid environmental change in African and South  
457 American tropics around 4000 years before present: a review, *Earth-Sci. Rev.*, 66, 217–  
458 260, 2004.
- 459 Meisch, C.: Freshwater Ostracoda of Western and Central Europe, Spektrum, Heidelberg, 522  
460 pp., 2000.
- 461 Moy, C. M., Seltzer, G. O., Rodbell, D. T., and Anderson, D. M.: Variability of El  
462 Niño/Southern Oscillation activity at millennial timescales during the Holocene epoch,  
463 *Nature*, 420, 162–165, 2002.
- 464 O’Brien, S. R., Mayewski, P. A., Meeker, L. D., Meese, D. A., Twickler, M. S., and Whitlow,  
465 S. I.: Complexity of Holocene climate as reconstructed from a Greenland ice core,  
466 *Science*, 270, 1962–1964, 1995.
- 467 Reimer, P. J., Baillie, M. G. L., Bard, E., Bayliss, A., Beck, J. W., Bertrand, C. J. H., Blackwell,  
468 P. G., Buck, C. E., Burr, G. S., Cutler, K. B., Damon, P. E., Edwards, R. L., Fairbanks, R.  
469 G., Friedrich, M., Guilderson, T. P., Hogg, A. G., Hughen, K. A., Kromer, B., McCormac,  
470 G., Manning, S., Bronk Ramsey, C., Reimer, R. W., Remmele, S., Southon, J. R., Stuiver,  
471 M., Talamo, S., Taylor, F. W., van der Plicht, J., and Weyhenmeyer, C. E.: Intcal04  
472 terrestrial radiocarbon age calibration, 0–26 cal kyr BP, *Radiocarbon*, 46, 1029–58, 2004.



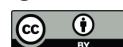

- 473 Staubwasser, M. and Weiss, H.: Holocene climate and cultural evolution in late prehistoric–  
474 early historic West Asia, *Quaternary Res.*, 66, 372–387, 2006.
- 475 Stott, L., Cannariato, K., Thunell, R., Haug, G. H., Koutavas, A., and Lund, S.: Decline of  
476 surface temperature and salinity in the western tropical Pacific Ocean in the Holocene  
477 epoch, *Nature*, 431, 56–59, 2004.
- 478 Wang, S. M. and Ji, L.: *Paleolimnology of Hulun Lake*, University of Science and  
479 Technology of China Press, Hefei, 125 pp., 1995 (in Chinese).
- 480 Weiss, H., Courty, M. A., Wetterstrom, W., Guichard, F., Senior, L., Meadow, R., and  
481 Curnow, A.: The genesis and collapse of third millennium north Mesopotamian  
482 civilization, *Science*, 261, 995–1004, 1993.
- 483 Weiss, H. and Bradley, R. S.: What drives societal collapse? *Science*, 291, 609–610, 2001.
- 484 Wen, R. L., Xiao, J. L., Chang, Z. G., Zhai, D. Y., Xu, Q. H., Li, Y. C., Itoh, S., and Lomtatidze,  
485 Z.: Holocene climate changes in the mid-high latitude monsoon margin reflected by the  
486 pollen record from Hulun Lake, northeastern Inner Mongolia, *Quaternary Res.*, 73, 293–  
487 303, 2010a.
- 488 Wen, R. L., Xiao, J. L., Chang, Z. G., Zhai, D. Y., Xu, Q. H., Li, Y. C., and Itoh, S.: Holocene  
489 precipitation and temperature variations in the East Asian monsoonal margin from  
490 pollen data from Hulun Lake in northeastern Inner Mongolia, China, *Boreas*, 39, 262–  
491 272, 2010b.
- 492 Wen, R. L., Xiao, J. L., Ma, Y. Z., Feng, Z. D., Li, Y. C., and Xu, Q. H.: Pollen–climate  
493 transfer functions intended for temperate eastern Asia, *Quaternary Int.*, 311, 3–11, 2013.
- 494 Wu, W. X. and Liu T. S.: Possible role of the “Holocene Event 3” on the collapse of Neolithic  
495 Cultures around the Central Plain of China, *Quaternary Int.*, 117, 153–166, 2004.
- 496 Xiao, J. L., Chang, Z. G., Wen, R. L., Zhai, D. Y., Itoh, S., and Lomtatidze, Z.: Holocene weak  
497 monsoon intervals indicated by low lake levels at Hulun Lake in the monsoonal margin  
498 region of northeastern Inner Mongolia, China, *Holocene*, 19, 899–908, 2009.
- 499 Xu, Z. J., Jiang, F. Y., Zhao, H. W., Zhang, Z. B., and Sun, L.: *Annals of Hulun Lake*, Jilin  
500 Literature and History Publishing House, Changchun, 691 pp., 1989 (in Chinese).
- 501 Zhai, D. Y., Xiao, J. L., Zhou, L., Wen, R. L., Chang, Z. G., Wang, X., Jin, X. D., Pang, Q. Q.,  
502 and Itoh, S.: Holocene East Asian monsoon variation inferred from species assemblage



503 and shell chemistry of the ostracodes from Hulun Lake, Inner Mongolia, Quaternary  
 504 Res., 75, 512–522, 2011.  
 505 Zhang, J. C. and Lin, Z. G.: Climate of China, Shanghai Scientific and Technical Publishers,  
 506 Shanghai, 603 pp., 1985 (in Chinese).

# 510 Figure captions

512 **Figure 1.** Map of Hulun Lake (from <http://www.maps.google.com>) showing the location of  
 513 the HL06 core. The bathymetric survey of the lake was conducted in July 2005 with a FE-606  
 514 Furuno Echo Sounder (contours in meters). The inset gives a sketch map of China showing  
 515 the current northern limit of the East Asian summer monsoon (dashed line) defined as the  
 516 400-mm isohyet of mean annual precipitation (Chinese Academy of Sciences, 1984; Zhang  
 517 and Lin, 1985) and the location of Hulun Lake (solid circle). EASM shown in the inset  
 518 indicates the East Asian summer monsoon.

520 **Figure 2.** Lithological log and age–depth model of the segment of the HL06 core between  
 521 105 and 55 cm at core depth (covering the period between 5000 and 3000 cal. yr BP). Solid  
 522 circles represent the mean values of  $2\sigma$  ranges of calibrated ages of carbon reservoir-corrected  
 523 radiocarbon dates. The carbon reservoir correction factor is  $685 \pm 21$  yr,  $^{14}\text{C}$  age of the  
 524 uppermost 1 cm of the core sediments. Modified after Xiao et al. (2009).

526 **Figure 3.** Time series of sand fraction (%) (Xiao et al., 2009), littoral ostracodes valve (valves  
 527  $\text{g}^{-1}$ ) (Zhai et al., 2011), Chenopodiaceae pollen (%) (Wen et al., 2010a), and mean annual  
 528 precipitation (mm) (Wen et al., 2010b) from the HL06 core spanning the period between 5000  
 529 and 3000 cal. yr BP as well as the PCA F1 obtained from the aforementioned four proxies.  
 530 The chronology was derived from the carbon reservoir-corrected age–depth model; ages of  
 531 sampled horizons were determined by linear interpolation between radiocarbon-dated  
 532 horizons using the mean values of  $2\sigma$  ranges of calibrated ages (Xiao et al., 2009). Vertical



dashed lines show the averages of each proxy data as well as the average of PCA F1 values during the period between 5000 and 3000 cal. yr BP. Light grey bars mark the intervals at which the proxy or PCA F1 has higher-than-average (lower-than-average for mean annual precipitation) values. The dark grey bar superimposed on light grey bars represents the interval at which PCA F1 values are higher than the average of the higher-than-average values for 5000–3000 cal. yr BP.

**Figure 4.** A sketch map of eastern China, Korea and western Japan showing precipitation rates of the current East Asian summer monsoon. Data are averaged by observations of the years 1979–2007 and expressed in  $\text{mm d}^{-1}$  at a grid resolution of  $0.25^\circ \times 0.25^\circ$ . (a) On the 4th, 5th and 6th pentads of July and 1st pentad of August. (b) On the 5th and 6th pentads of June and the 1st and 2nd pentads of July. (c) On the 5th and 6th pentads of May and the 1st and 2nd pentads of June.

**Figure 5.** Correlation of dry–wet oscillation in the Hulun Lake region denoted by PCA F1 factor from the four proxies of the HL06 core with sea-surface temperature (SST,  $^\circ\text{C}$ ) reconstructed on the Mg/Ca ratio of *Globigerinoides ruber* from MD98-2176 core in the western tropical Pacific (Stott et al., 2004) and hematite-stained grain concentration (HSG, %) in VM29-191 core from the North Atlantic (Bond et al., 2001). The shaded bar marks an interval of dry event occurring in the Hulun Lake region at 4230–3820 cal. yr BP.

**Table 1.** AMS radiocarbon dates of samples from the segment of the HL06 core between 105 and 55 cm at core depth (covering the period between 5000 and 3000 cal. yr BP). The radiocarbon date of the uppermost 1 cm of the core sediments used for carbon reservoir correction is shown. Modified after Xiao et al. (2009).



**Figure 1**

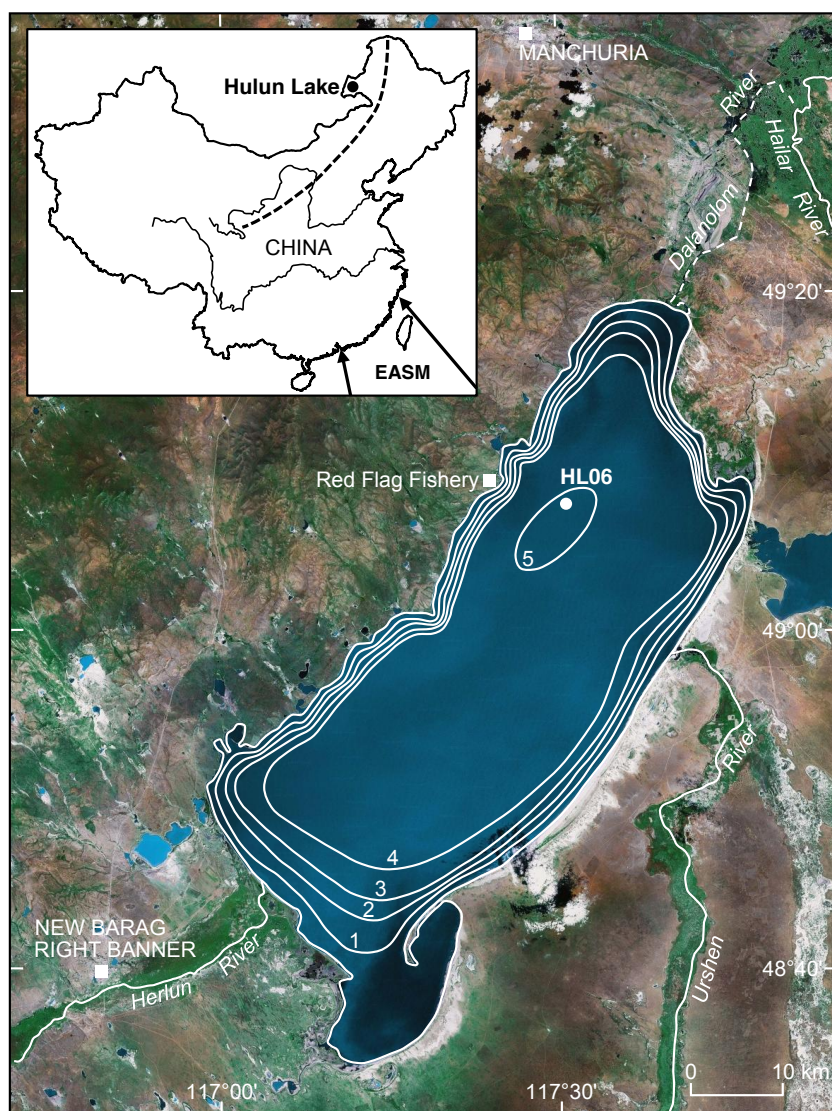



**Figure 2**

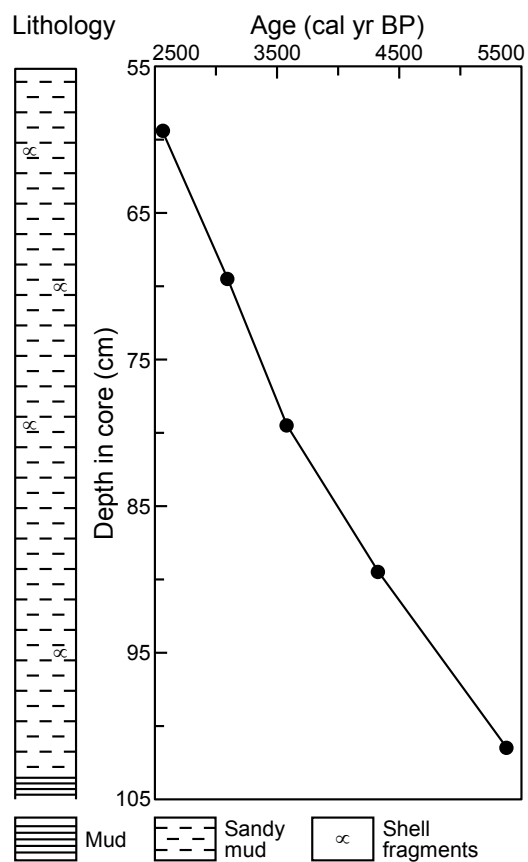



**Figure 3**

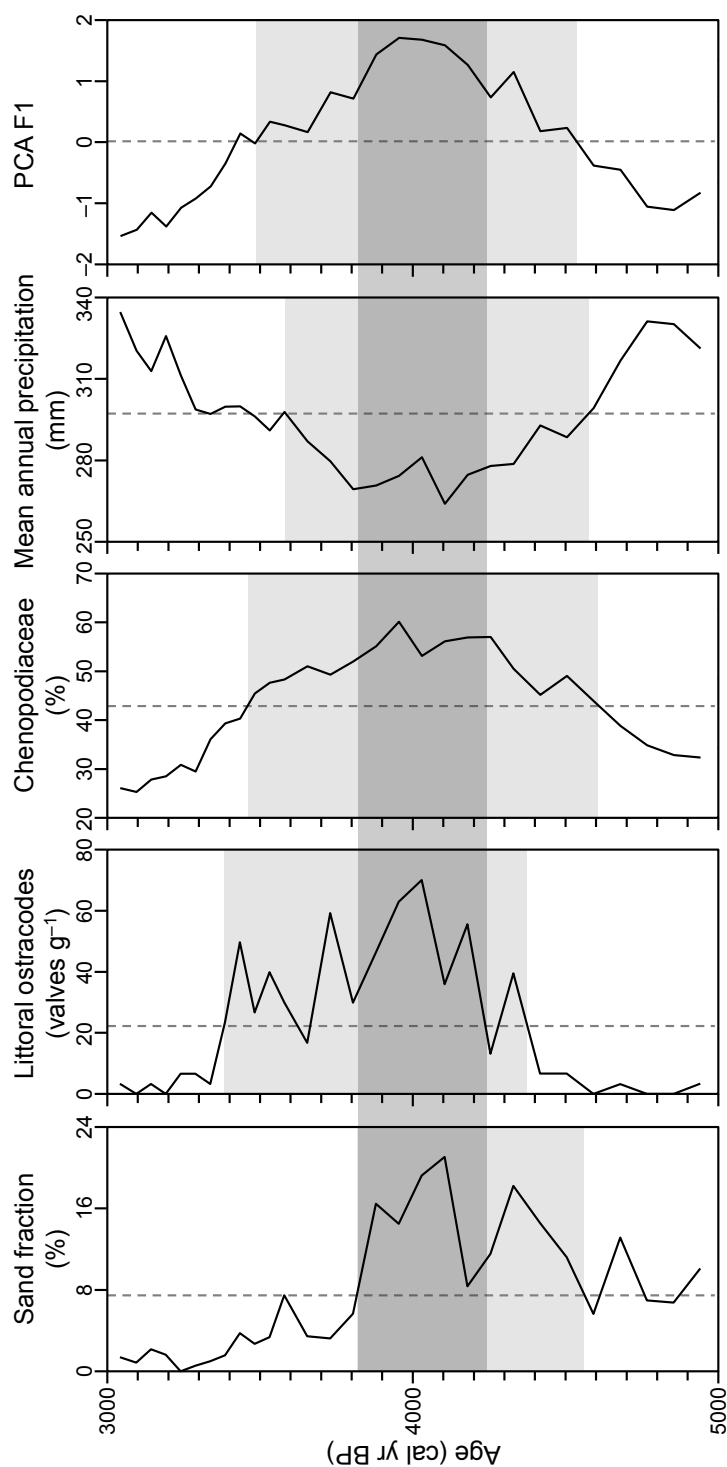



**Figure 4**

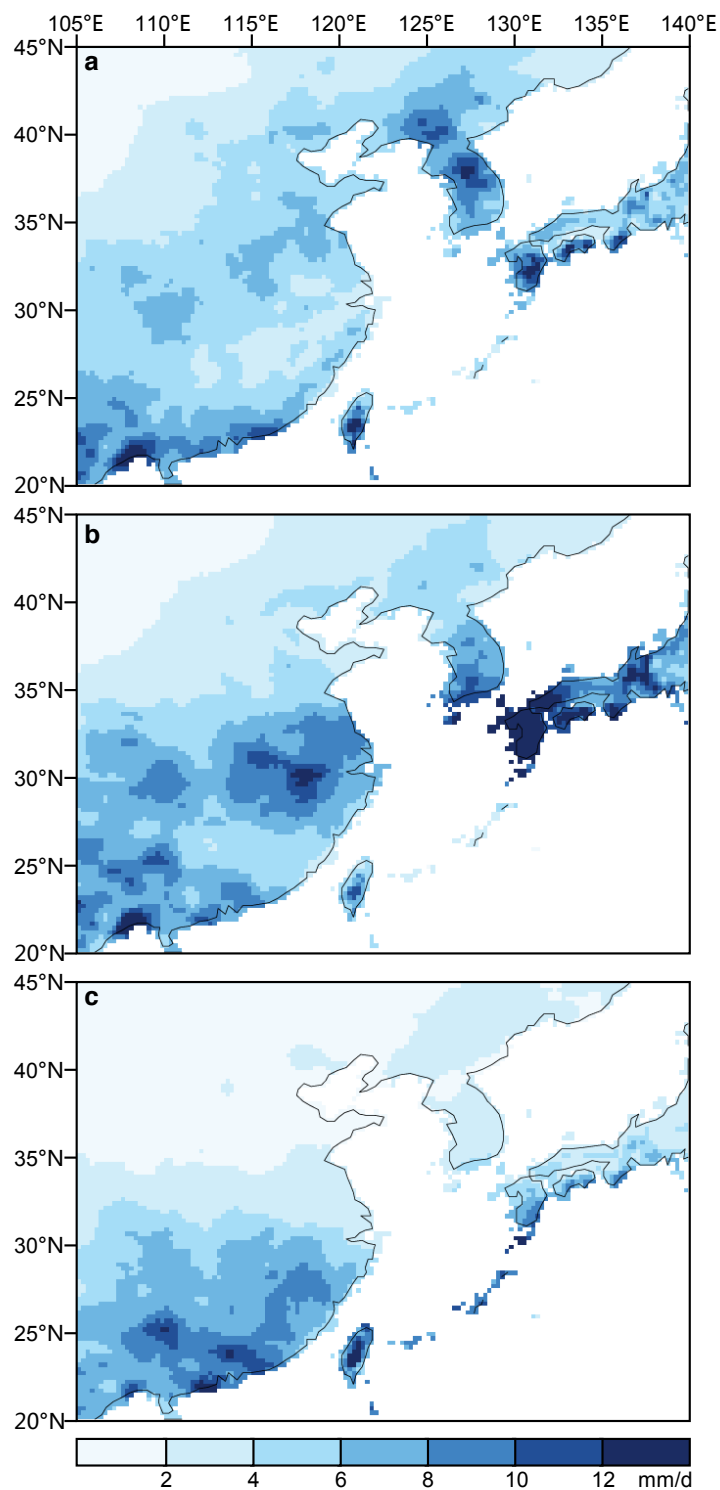



**Figure 5**

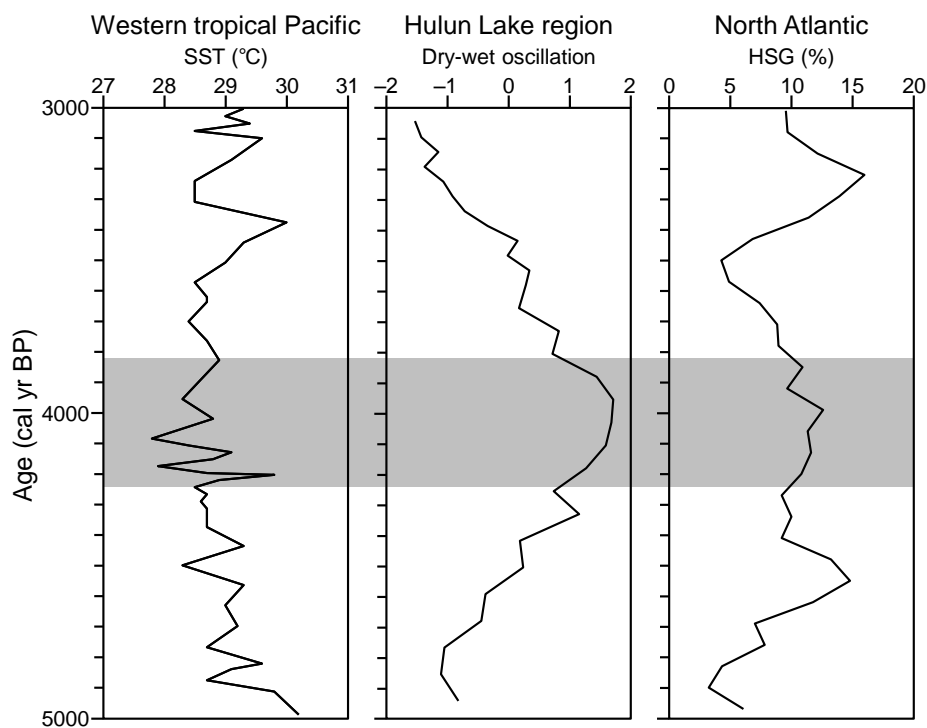





**Table 1**

| Laboratory number <sup>a</sup> | Depth interval (cm) | Dating material | $\delta^{13}\text{C}$ (‰) | AMS $^{14}\text{C}$ age (C yr BP) | Corrected $^{14}\text{C}$ age <sup>b</sup> (C yr BP) | Calibrated $^{14}\text{C}$ age (2 $\sigma$ ) (cal yr BP) |
|--------------------------------|---------------------|-----------------|---------------------------|-----------------------------------|------------------------------------------------------|----------------------------------------------------------|
| PLD-7489                       | 0–1                 | Organic matter  | –26.94                    | 685±21                            | 0±30                                                 | 0–10                                                     |
| PLD-7925                       | 59–60               | Organic matter  | –26.57                    | 3222±29                           | 2537±36                                              | 2480–2650                                                |
| PLD-7495                       | 69–70               | Organic matter  | –27.73                    | 3630±27                           | 2945±34                                              | 2970–3220                                                |
| PLD-7926                       | 79–80               | Organic matter  | –26.72                    | 4034±30                           | 3349±37                                              | 3470–3690                                                |
| PLD-7927                       | 89–90               | Organic matter  | –25.40                    | 4575±31                           | 3890±37                                              | 4230–4430                                                |
| PLD-7496                       | 101–102             | Organic matter  | –28.38                    | 5304±27                           | 4619±34                                              | 5290–5470                                                |

<sup>a</sup> Laboratory code of Paleo Labo Co., Ltd., Japan.

<sup>b</sup> The reservoir correction factor is 685±21 yr,  $^{14}\text{C}$  age of the uppermost 1 cm of the core sediments.
